# Supplementary material
Source: PubMed Central journal article supplement (PMC4746679)
Supplement: supp_tpc.15.00626_TPC2015-00626-RAR1_Supplemental_Data_pdf.pdf [file supp_tpc.15.00626_TPC2015-00626-RAR1_Supplemental_Data_pdf.pdf]

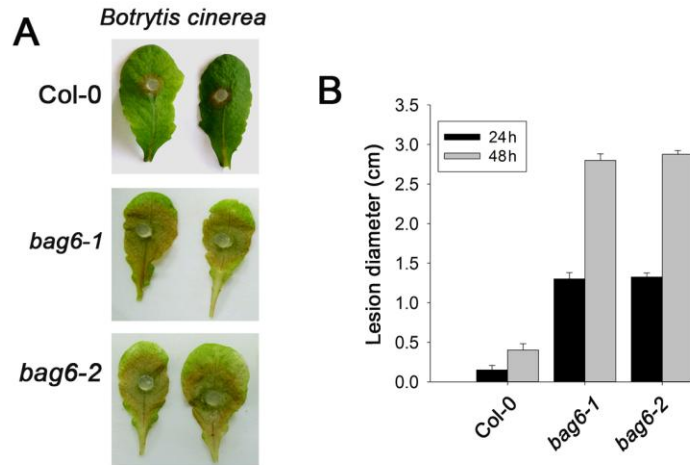

**Supplementary Figure 1. Enhanced susceptibility of *bag6* mutants to *Botrytis cinerea*.** (A) Wild-type Col-0 and *bag6* mutants, *bag6-1* (SALK\_009534C) and *bag6-2* (SALK\_073331C) were inoculated with *B. cinerea* at high humidity. Representative photographs were taken 48 h post inoculation. (B) Lesion diameters were measured at 24 h and 48 h post inoculation. Data are means  $\pm$  standard deviations from three replicates.

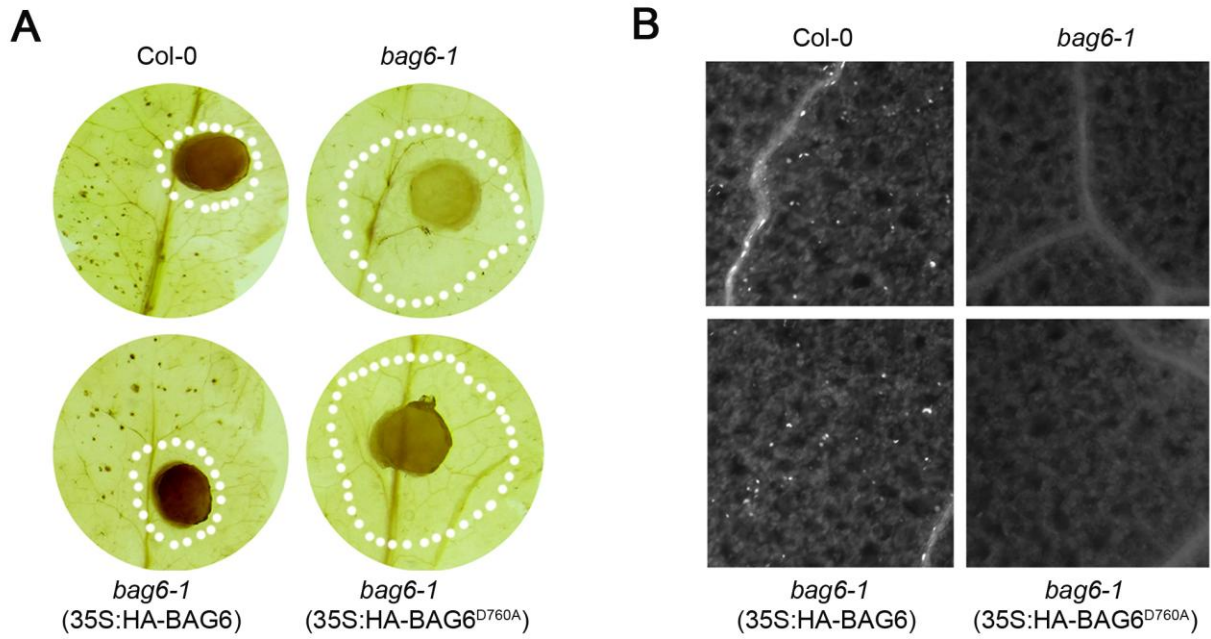

**Supplementary Figure 2. H<sub>2</sub>O<sub>2</sub> and callose accumulation in Arabidopsis plants expressing BAG6 in response to *Botrytis cinerea*.** (A) DAB-stained Arabidopsis leaves following agar plug inoculation with *B. cinerea*. Images were collected 48 h post inoculation. White dotted lines represent the edge of the observable lesion. (B) Callose formation in inoculated Arabidopsis leaves was revealed by aniline blue staining. Images were taken 48 h post inoculation.

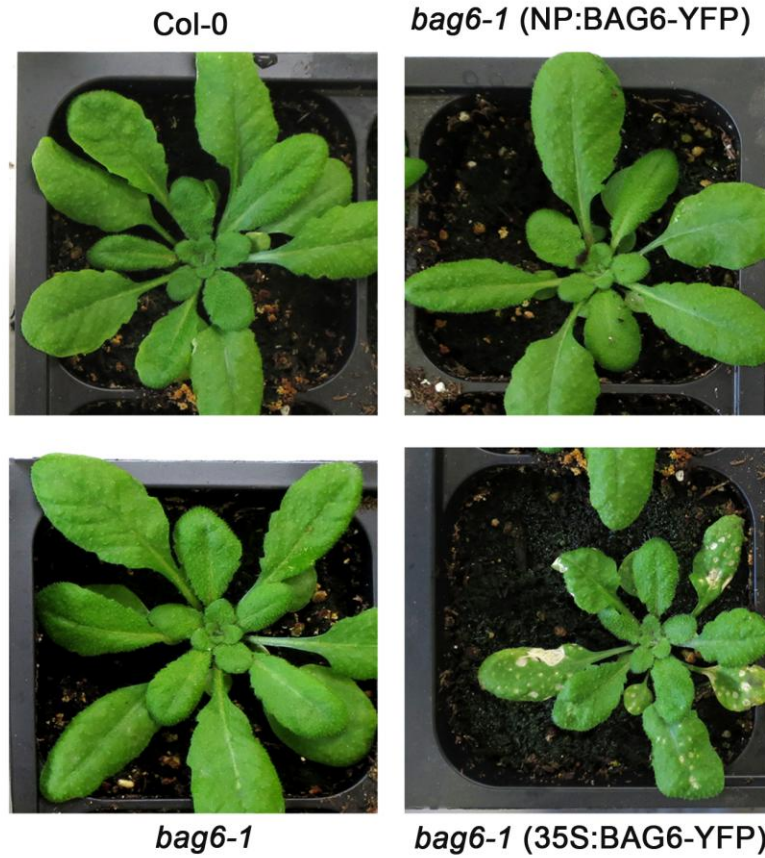

**Supplementary Figure 3. Overexpression of BAG6 in Arabidopsis induces a lesion mimic phenotype.** Arabidopsis *bag6-1* T-DNA insertion mutant was transformed with C-terminal YFP-tagged BAG6 under either 35S promoter or native promoter (NP) by the floral dip method. Stable transgenic plants harboring BAG6 driven by the 35S promoter (35S: BAG6-YFP) exhibited apparent lesion mimics on leaves, while expressing BAG6 driven by its native promoter (NP:BAG6-YFP) were not different from wild type Col-0 and *bag6-1* mutants. All plants were grown in a growth chamber at  $200 \mu\text{E m}^{-2} \text{s}^{-1}$ . Representative plants were photographed to show the typical lesion mimic phenotype.

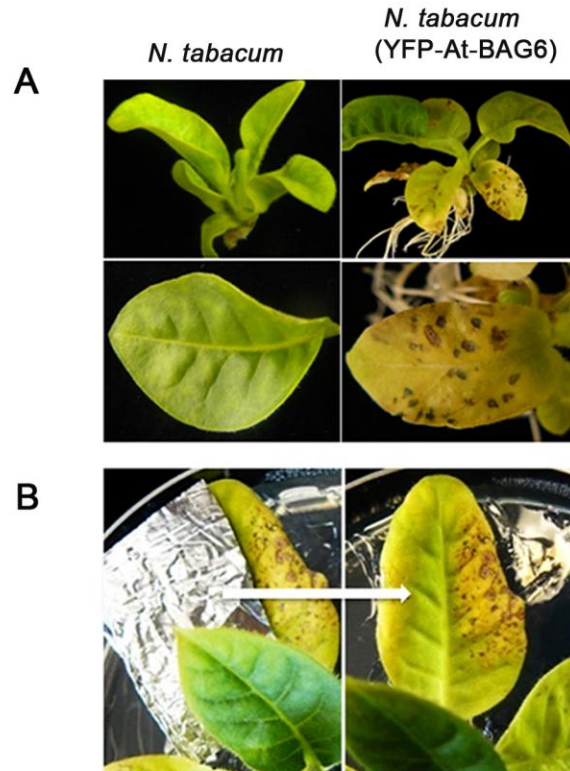

**Supplementary Figure 4. Arabidopsis *BAG6* expression in *Nicotiana tabacum* causes lesion mimics in a light-dependent manner. (A)** Wild-type tobacco *N. tabacum* and transgenic plants harboring YFP-At-BAG6 under the 35S promoter were grown in a growth chamber at  $200 \mu\text{E m}^{-2} \text{s}^{-1}$ . Representative lesion mimic phenotypes were photographed. **(B)** The lesion mimic phenotype of *BAG6* expressing plants was found to be light-dependent. Half leaf of transgenic tobacco was covered by foil to shade the light.

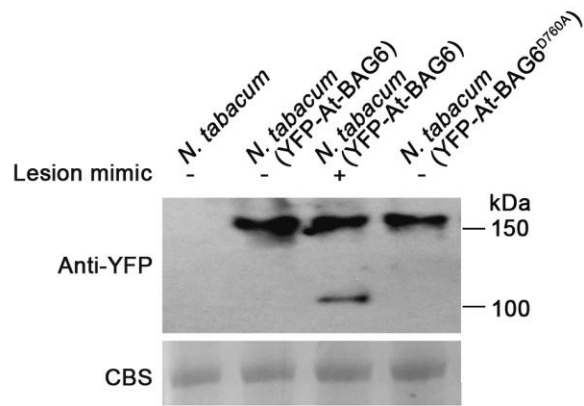

**Supplementary Figure 5. Lesion mimic development coincides with BAG6 cleavage.** Immunoblot analysis of wild-type *N. tabacum* and transgenic plants producing YFP-At-BAG6 or YFP-At-BAG6<sup>D760A</sup> under the 35S promoter using anti-YFP antibody. Equal loading was confirmed by SDS-PAGE and Coomassie brilliant blue staining.

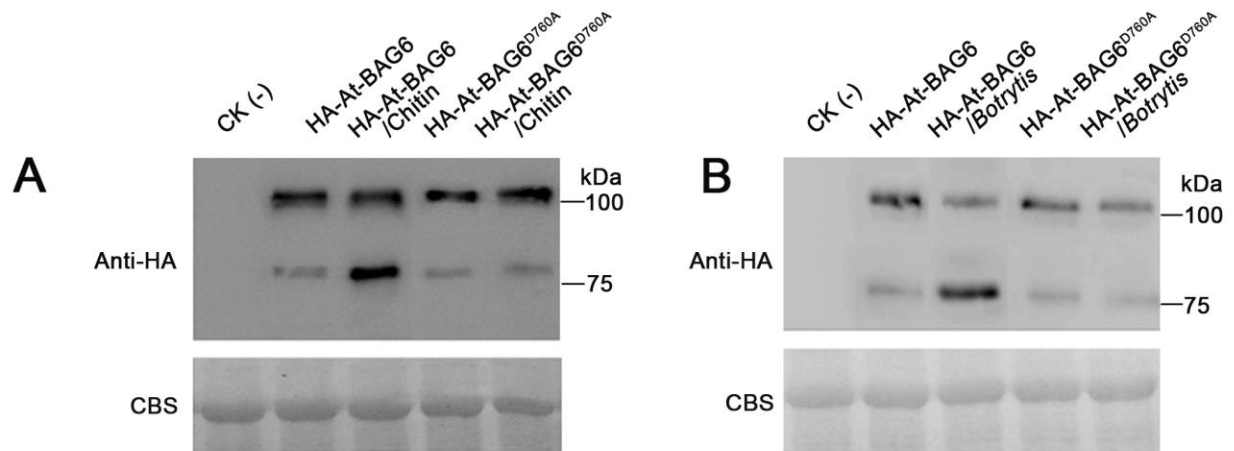

**Supplementary Figure 6. Arabidopsis BAG6 is cleaved by plant caspase-1-like protease activity *in vivo*.** *Nicotiana benthamiana* leaves transiently expressing HA-At-BAG6 and HA-At-BAG6<sup>D760A</sup> under the 35S promoter were infiltrated with 200 µg/ml chitin for 30 min (A) or inoculated with *B. cinerea* for 24 h (B) before harvesting. BAG6 cleavage was detected by anti-HA immunoblotting. Equal loading was confirmed by SDS-PAGE and Coomassie brilliant blue staining.



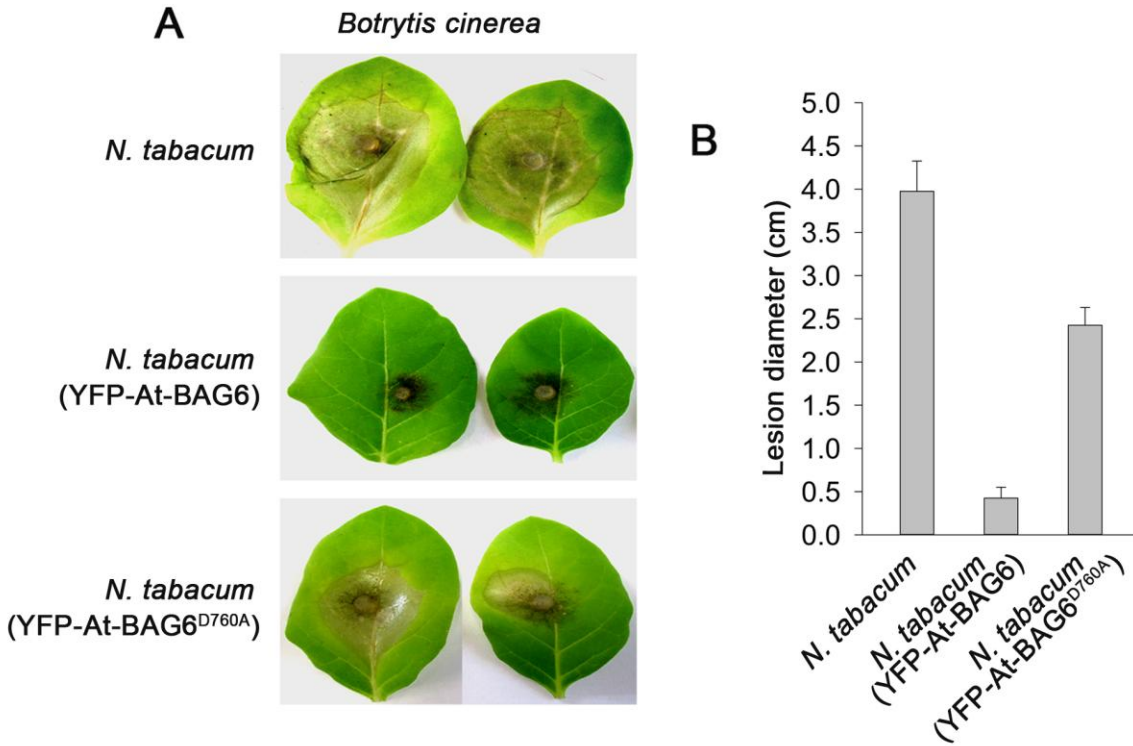

**Supplementary Figure 7. The processing of BAG6 is required for resistance to *Botrytis cinerea* in *Nicotiana tabacum*.** (A) *Nicotiana tabacum* wild-type, and transgenic plants producing either YFP-At-BAG6 or YFP-At-BAG6<sup>D760A</sup> under the 35S promoter, were inoculated with *B. cinerea*. Representative images were taken 48 hours post inoculation. (B) Lesion diameters were measured 48 hours post inoculation. Data are means  $\pm$  standard deviations from three replicates.

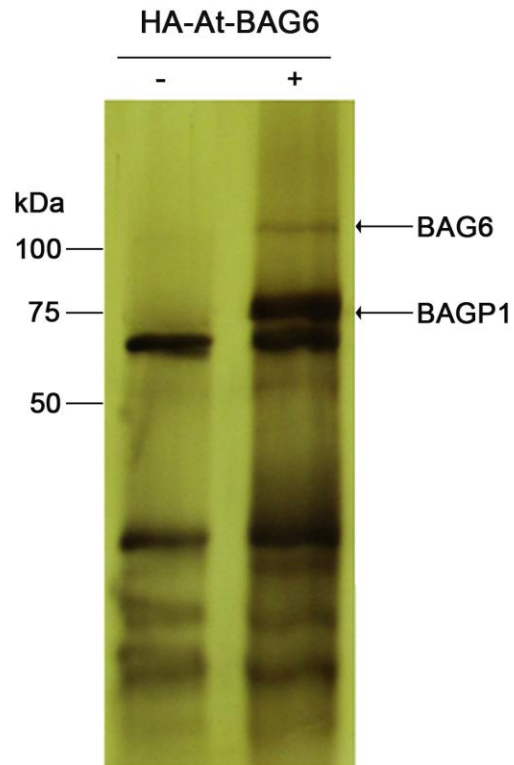

**Supplementary Figure 8. Pull-down assays indicate that BAG6 interacts with a C2-GRAM protein.**

HA-At-BAG6 under the 35S promoter was transiently expressed in *N. benthamiana*, proteins were extracted and purified with monoclonal anti-HA-agarose antibody, and eluted with specific HA-peptide. Equal protein samples were separated by 10 % SDS-PAGE and stained with SilverQuest™ Silver Staining Kit (Invitrogen) according to the manufacturer's recommendation.



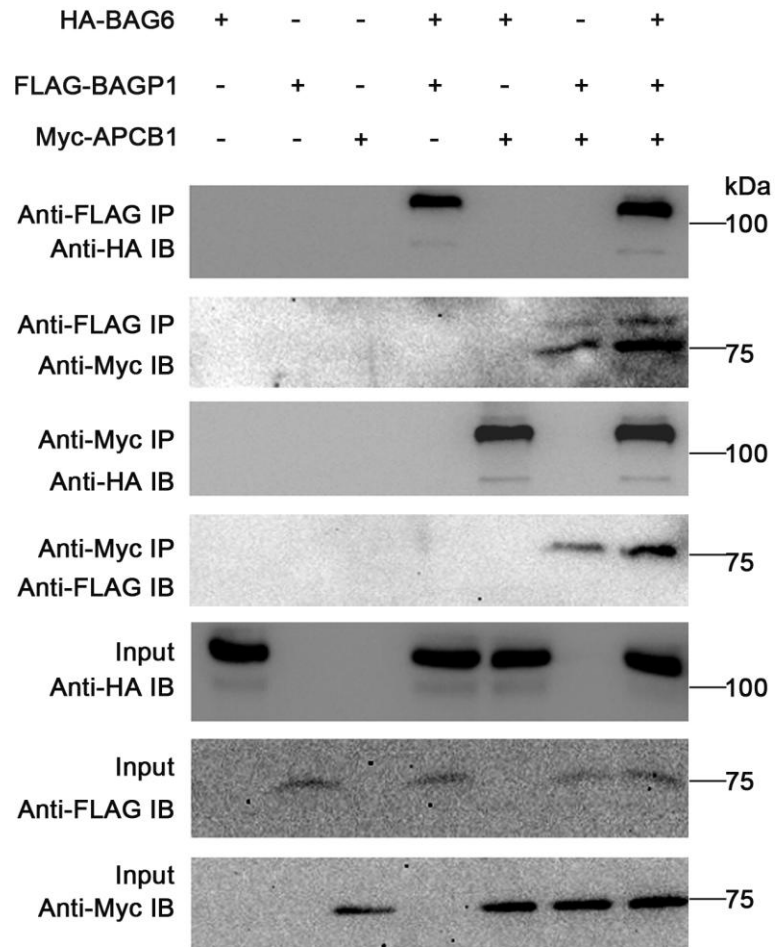

**Supplementary Figure 9. Arabidopsis BAG6, BAGP1 and APCB1 form a trimeric complex *in planta*.**

HA-BAG6 under the 35S promoter was co-expressed with FLAG-BAGP1 and/or Myc-APCB1 in Arabidopsis Col-0 protoplasts. Co-IP was carried out with an anti-FLAG or anti-myc antibody (IP), and proteins analyzed by immunoblotting with anti-HA, anti-FLAG, or anti-Myc antibody (IB), dependent on the protein fusions being tested.

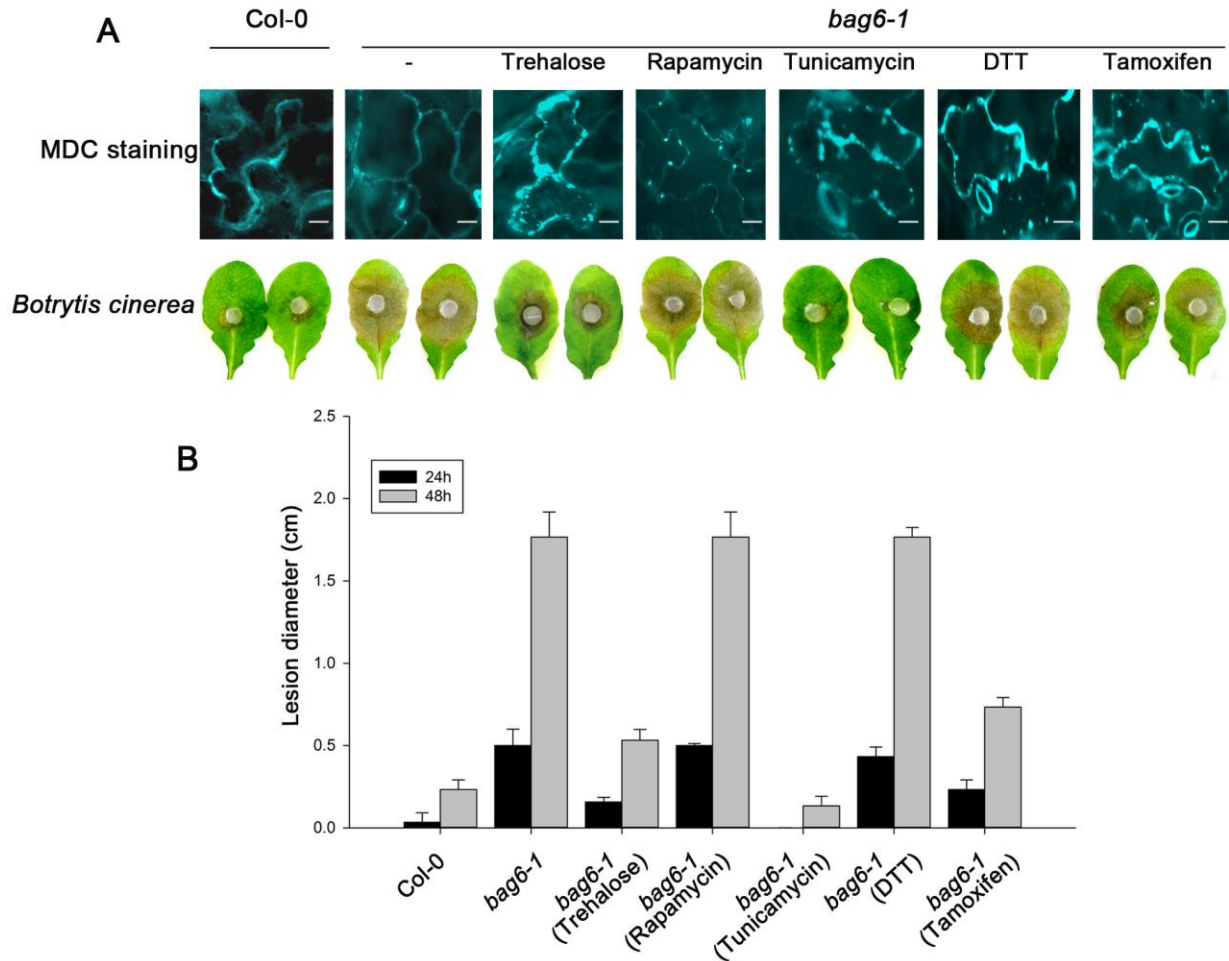

**Supplementary Figure 10. Chemical induced autophagy partially rescues resistance to *Botrytis cinerea* in the *bag6* mutant. (A)** The *bag6-1* mutant was pretreated with trehalose (150 mM), rapamycin (100 nM), tunicamycin (5  $\mu$ M), DTT (10 mM) and tamoxifen (10  $\mu$ M) for 12 h, and autophagic structures were detected by MDC staining (upper panel). Scale bar = 20  $\mu$ m. Wild-type Col-0, *bag6-1* mutants, and pretreated *bag6-1* mutant were inoculated with *B. cinerea* using colonized agar plugs, and lesions monitored over time. Photographs of representative leaves were taken 48 h post inoculation (lower panel). **(B)** Lesion diameters were measured 24 and 48 h post inoculation with *B. cinerea*. Data represent means  $\pm$  standard deviations from three replicates.
